# Supplementary material
Source: bioRxiv or medRxiv preprint supplement (https://www.biorxiv.org/highwire/filestream/58324/field_highwire_adjunct_files/0/158592-1.pdf)
Supplement: Supplementary file [file 158592-1.pdf]

Supporting Information for

# Transfer Learning from Markov models leads to efficient sampling of related systems

Mohammad M. Sultan<sup>1</sup>, & Vijay S. Pande<sup>1\*</sup>

<sup>1</sup>Department of Chemistry, Stanford University, 318 Campus Drive, Stanford, California 94305, USA.

\*Pande@stanford.edu

| Parameter           | Value      |
|---------------------|------------|
| Gaussian Height     | 0.5 kJ/mol |
| Gaussian width      | 0.1        |
| Bias Factor         | 6          |
| Gaussian Drop rate  | 6ps        |
| Swap rate           | 20ps       |
| Number of tics      | 2          |
| Feature Space       | Dihedrals  |
| Normalized Features | False      |

Table S1: Set of parameters used for the Bias-exchange tICA-Metadynamics simulations of Alanine dipeptide across 3 different FFs. For the amoeba calculation, we limited our sampling to only the dominant leading tIC.

| Parameter           | Value                                                                                 |
|---------------------|---------------------------------------------------------------------------------------|
| Gaussian Height     | 0.5 kJ/mol                                                                            |
| Gaussian width      | 0.045,0.08 (25% of the standard deviation from the unbiased WW-FIP Anton simulation). |
| Bias Factor         | 6                                                                                     |
| Gaussian Drop rate  | 5ps                                                                                   |
| Swap rate           | 2ns                                                                                   |
| Number of tics      | 2                                                                                     |
| Simulation Temp     | 395 K                                                                                 |
| Number of walkers   | 25/tIC                                                                                |
| Interval            | #Based upon the WW-FIP Anton dataset<br>tic_1: -1.07,1.95<br>tic_2: -12.11,1.83       |
| Feature Space       | Dihedrals + Closest Heavy atom contacts (Beta =10)                                    |
| Normalized Features | True                                                                                  |

Table S2: Set of parameters used for the Bias-exchange tICA-Metadynamics simulations of FIP and GTT mutants of WW domain. Each pair of tIC walkers is connected via MPI but the walkers themselves are only sharing the biases via a shared folder. For the closest heavy atom contacts, we used Plumed's definition of closest heavy atoms to make the contacts differentiable.

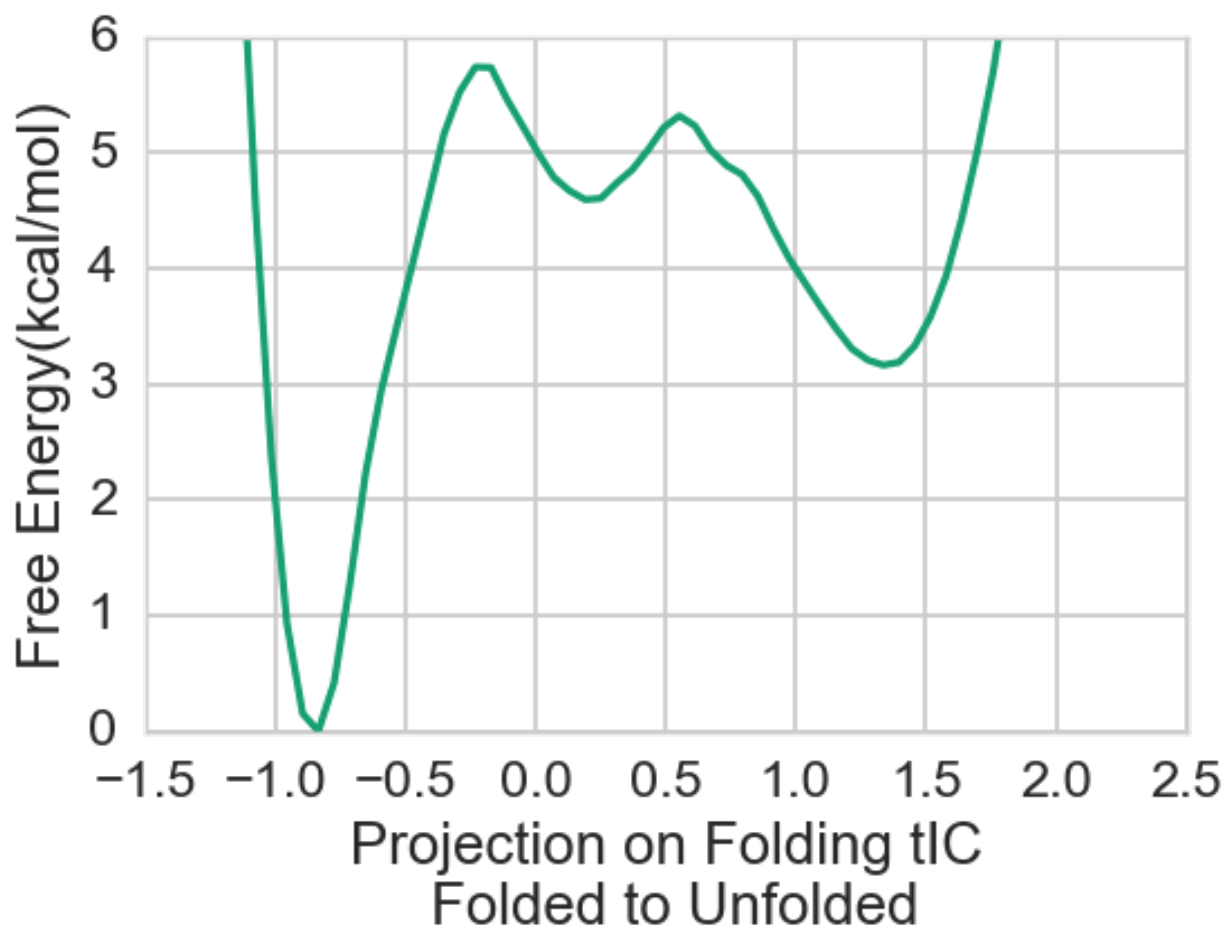

Figure S1: Anton - MSM solution to the FIP's free energy projection along the dominant tIC coordinate.

SI Note 1:

To reweight the FIP/GTT mutant multiple walkers Metadynamics simulation on to full phase space via MBAR, we used two different techniques though we found the results to be very similar. In the first instance, we used the last reported bias as input for MBAR. In the second, we corrected this bias using the time-independent free energy estimator of Tiwary et al<sup>1</sup>. To calculate the reversible work correction factor ( $c(t)$ ) across multiple walkers, we used the methodology from a recent paper<sup>2</sup>. For both methods, the reported MBAR-weighted populations (with or without the correction) were highly similar. We also removed the first 40ns from each walker to account for equilibration.

- (1) Tiwary, P.; Parrinello, M. A Time-Independent Free Energy Estimator for Metadynamics. *J. Phys. Chem. B* **2015**, *119* (3), 736–742.
- (2) Prajapati, J. D.; Fernández Solano, C. J.; Winterhalter, M.; Kleinekathöfer, U. Characterization of Ciprofloxacin Permeation Pathways across the Porin OmpC Using

Metadynamics and a String Method. *J. Chem. Theory Comput.* **2017**, acs.jctc.7b00467.
